# Supplementary material for: Unveiling the therapeutic potential of Dl-3-n-butylphthalide in NTG-induced migraine mouse: activating the Nrf2 pathway to alleviate oxidative stress and neuroinflammation
Source: J Headache Pain. 2024 Apr 2;25(1):50. doi: 10.1186/s10194-024-01750-1 (PMC10986135; doi:10.1186/s10194-024-01750-1)
Supplement: Supplementary file 2 — Supplementary Material 2. [file 10194_2024_1750_MOESM2_ESM.xlsx]

## Sheet: Sheet1
Figure4C							Figure6A								Figure7A							Figure7B							Figure7E							Figure8A							Figure8C
